# Supplementary material
Source: PubMed Central journal article supplement (PMC5773100)
Supplement: NIHMS932033-supplement-Table.pdf [file NIHMS932033-supplement-Table.pdf]

**Supplemental Table 1. Three track regulatory framework for FMT**

|                                                             | <b>Track 1: Stool product from person known to patient or physician; FMT performed by physician</b>                                    | <b>Track 2: FMT using stool from stool bank</b>                                                                                                                    | <b>Track 3: Use of modified stool-based products (drugs) with abbreviated IND</b>                                                |
|-------------------------------------------------------------|----------------------------------------------------------------------------------------------------------------------------------------|--------------------------------------------------------------------------------------------------------------------------------------------------------------------|----------------------------------------------------------------------------------------------------------------------------------|
| <b>Regulator</b>                                            | Individual states under the “practice of medicine”                                                                                     | FDA will regulate stool banks and stool similarly to how it regulates tissue banks and human cells, tissues, and cellular and tissue-based products (HCT/Ps).      | FDA                                                                                                                              |
| <b>Allowed use</b>                                          | FMT for CDI can be performed under practice of medicine paradigm.                                                                      | Stool from a registered stool bank can be used for CDI; other indications require an IND.                                                                          | Product can be used for its indicated use as set forth in the product’s New Drug Application approval (see off-label use below). |
| <b>IND Requirement</b>                                      | Physician administering FMT for CDI with known donor not required to obtain an IND.                                                    | IND required for indications other than CDI.                                                                                                                       | Sponsor must obtain IND. Phase II and III clinical trials required (with modification of characterization requirements).         |
| <b>Adverse Event Reporting</b>                              | Local health departments or state medical boards could require adverse event reporting.                                                | Physician adverse event reporting to stool bank would be required similar to 21 CFR Part 1271.350(a) for certain adverse reactions related to the transplantation. | Manufacturers must follow the FDA’s adverse event reporting procedures for drugs or biologics.                                   |
| <b>Registry</b>                                             | Local health departments or state medical boards could require physicians performing FMTs to collect data and submit it to a registry. | Stool banks must collect data on all FMT patient outcomes and report results to a national registry.                                                               | Not required.                                                                                                                    |
| <b>Off-Label Use (i.e., use for unapproved indications)</b> | IND required for new indications unless “clinical innovation.”                                                                         | N/A                                                                                                                                                                | Off-label use will be allowed as it is under current law.                                                                        |
| <b>Exclusivity</b>                                          | N/A                                                                                                                                    | N/A unless stool bank receives approval for its product as a new drug.                                                                                             | Current FDA rules relating to exclusivity for new drugs and biologics apply (but would not exclude Track 1 or 2 FMTs).           |
| <b>Donor Screening/Safety</b>                               | State Departments of Public Health would set screening standards for donors that are known to patient or physician.                    | All stool donors and donations should be tested for infectious agents and the FDA should publish a list of pathogens and testing criteria.                         | Manufacturer must follow all relevant regulations relating to chemistry, manufacturing and controls required for drugs by FDA.   |
| <b>Good Manufacturing Practices (GMPs)</b>                  | N/A although state or local departments of public health could establish processes for handling.                                       | Stool banks must follow all regulations relating to stool bank GMPs (to be developed by the FDA).                                                                  | Drug manufacturers must follow all relevant FDA regulations for GMPs for drugs.                                                  |
| <b>Storage and transportation</b>                           | Biological material will be sourced from donors. State or local health departments may establish standards for short term storage.     | FDA to set standards for storage and transporting of samples as is done for HCT/Ps.                                                                                | Drug manufacturers must follow all relevant FDA regulations for storage and transportation of drugs.                             |
